# Supplementary material
Source: PubMed Central journal article supplement (PMC6478408)
Supplement: jciinsight-4-125556-s195.pdf [file jciinsight-4-125556-s195.pdf]

## Supplemental Methods

*List of clinical study sites.* As described in the Methods, all trials were conducted under protocols approved by the institutional review boards for each study site. The full list of sites follows.

1. University of Arizona, Tucson, Arizona, USA
2. University of Southern California / Children's Hospital Los Angeles, Los Angeles, California, USA
3. Children's Hospital and Research Center, Oakland, California, USA
4. Diabetes Center at University of California San Francisco, San Francisco, California, USA
5. University of California at San Diego / San Diego Children's Hospital, San Diego, California, USA
6. Stanford University, Stanford, California, USA
7. Barbara Davis Center for Childhood Diabetes, Aurora, Colorado, USA
8. Yale University, New Haven, Connecticut, USA
9. University of Florida, Gainesville, Florida, USA
10. University of Miami, Miami, Florida, USA
11. Emory Children's Center, Atlanta, Georgia, USA
12. Medical College of Georgia, Augusta, Georgia, USA
13. Indiana University / Riley Hospital for Children, Indianapolis, Indiana, USA
14. University of Iowa Hospital & Clinics, Iowa City, Iowa, USA
15. University of Maryland, Baltimore, Maryland, USA
16. Joslin Diabetes Center, Boston, Massachusetts, USA
17. Massachusetts General Hospital, Boston, Massachusetts, USA
18. University of Minnesota, Minneapolis, Minnesota, USA
19. Children's Mercy Hospital, Kansas City, Missouri, USA
20. Creighton University, Omaha, Nebraska, USA
21. Columbia University / Naomi Berrie Diabetes Center, New York, New York, USA
22. University of North Carolina, Durham, North Carolina, USA
23. University of Pennsylvania / Children's Hospital of Philadelphia, Philadelphia, Pennsylvania, USA
24. University of Pittsburgh / Children's Hospital of Pittsburgh, Pittsburgh, Pennsylvania, USA
25. University of Texas Southwestern Medical Center, Dallas, Texas, USA
26. Benaroya Research Institute, Seattle, Washington, USA
27. Pacific Northwest Research Institute / University of Washington, Seattle, Washington, USA
28. Walter and Eliza Hall Institute of Medical Research, Parkville, Victoria, Australia
29. Hospital for Sick Children, Toronto, Ontario, Canada
30. San Raffaele Hospital, Milan, Italy
